# Supplementary material for: Improvement of Photoresponse in Organic Phototransistors through Bulk Effect of Photoresponsive Gate Insulators
Source: MDPI journal article supplement (doi:10.3390/ma13071565), 2020-03-28
Supplement: s1 [file s1]

# Supplementary Materials: Improvement of photoresponse in organic phototransistors through bulk effect of photoresponsive gate insulators

Hea-Lim Park <sup>1</sup>, Min-Hoi Kim <sup>2</sup> and Hyeok Kim <sup>3,\*</sup>

<sup>1</sup> Department of Materials Science and Engineering, Seoul National University, Kwanak-gu, Seoul 151-600, Republic of Korea; haelim1017@snu.ac.kr

<sup>2</sup> Department of Creative Convergence Engineering, Hanbat National University, Yuseong-gu, Daejeon 305-719, Republic of Korea; mhkim8@hanbat.ac.kr

<sup>3</sup> School of Electrical and Computer Engineering, University of Seoul, 163 Seoulsiripdaero, Dongdaemun-gu, Seoul 02504, Republic of Korea

\* Correspondence: hyeok.kim@uos.ac.kr; Tel.: +82-2-6490-2354

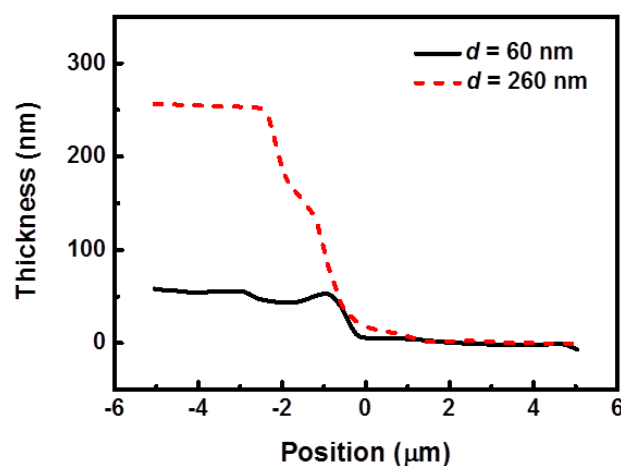

**Figure S1.** Real thickness data of the produced PVP layers ( $d = 60$  and  $260$  nm). Actual thickness values indicated as  $d = 60$  nm and  $260$  nm were about  $55$  nm and  $255$  nm, respectively.

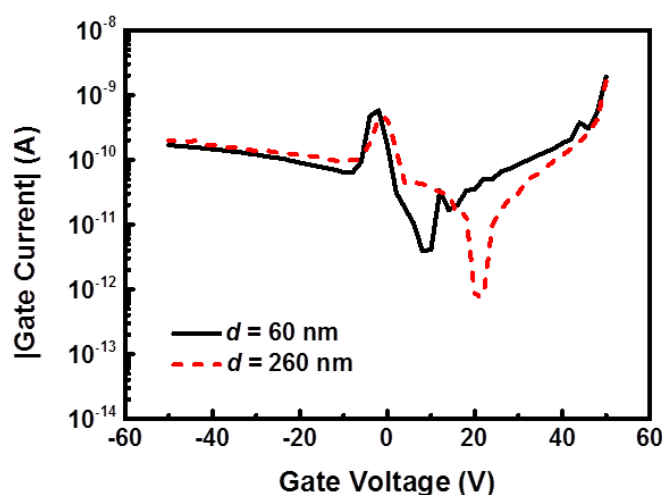

**Figure S2.** Comparison of gate leakage current of the OPTs with two different thicknesses of PVP ( $d = 60$  and  $260$  nm) in the dark.

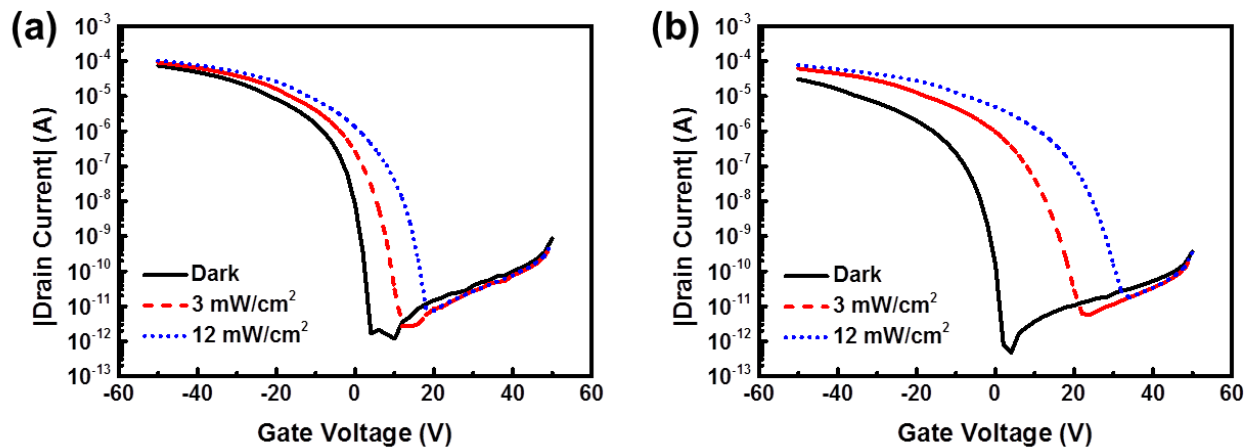

**Figure S3.** Transfer curves of the OPTs with two different thicknesses,  $d$ , of PVP, in the dark and under different intensity light exposure (3 and 12 mW/cm<sup>2</sup>); (a)  $d = 60$  nm and (b)  $d = 260$  nm.

The onset voltage shift ( $\Delta V_{on}$ ) of the devices after light exposure was examined. It is noteworthy that the  $\Delta V_{on}$  values have been widely investigated as a parameter for evaluating the photoresponse of OPTs. As shown in Fig. S3, under light illumination (3 mW/cm<sup>2</sup>), the  $\Delta V_{on}$  values of the  $d = 60$  and 260 nm cases were 7 and 20 V, respectively. In addition, under higher light intensity of 12 mW/cm<sup>2</sup>, the thicker device also showed same tendency, that is, higher  $\Delta V_{on}$  value of 31 V than the thinner device ( $\Delta V_{on} = 14$  V). It should be noted that, as light intensity increased,  $\Delta V_{on}$  values were enhanced.

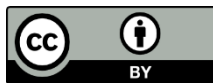

© 2020 by the authors. Licensee MDPI, Basel, Switzerland. This article is an open access article distributed under the terms and conditions of the Creative Commons Attribution (CC BY) license (<http://creativecommons.org/licenses/by/4.0/>).
